# Supplementary material for: Regulation of coronavirus nsp15 cleavage specificity by RNA structure
Source: PubMed Central journal article supplement (PMC10449227; doi:10.1371/journal.pone.0290675), 2023-08-24

Uncropped gel for Fig 2A. Gel was captured with BioRad GelDock+ using the SYBR Green protocol.

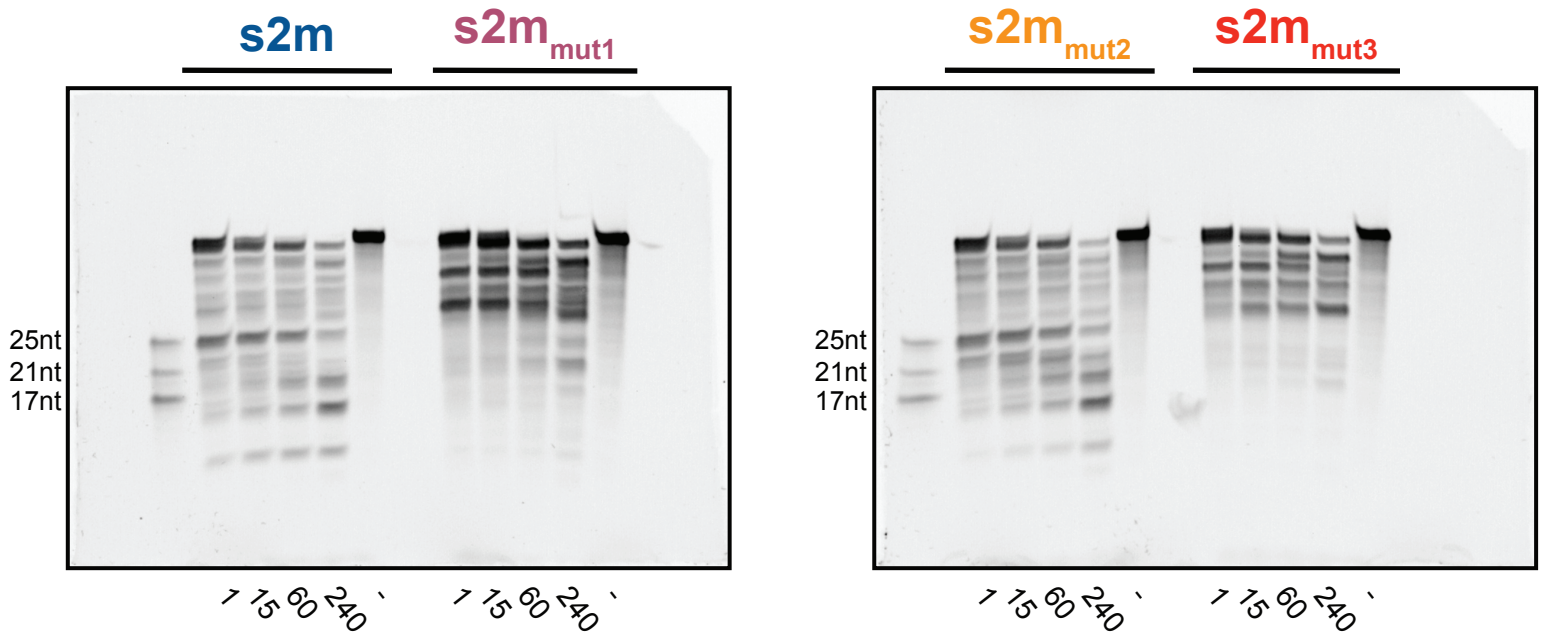

Uncropped gel for Fig 2D. Gel was captured with BioRad GelDock+ using the SYBR Green protocol.

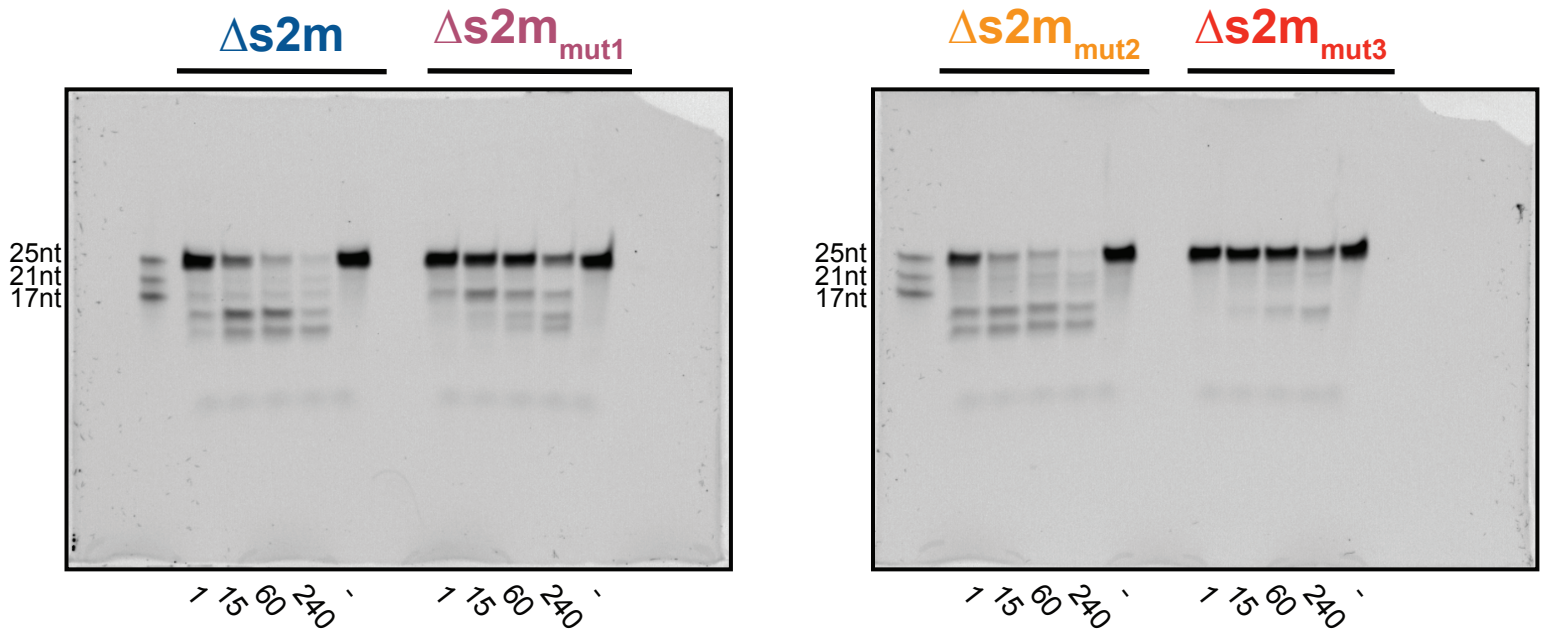

Uncropped gel for Fig 3A. Gel was captured with BioRad GelDock+ using the SYBR Green protocol.

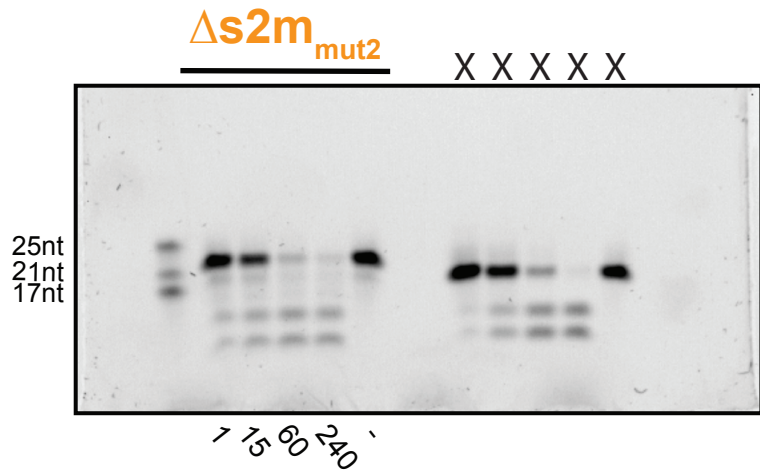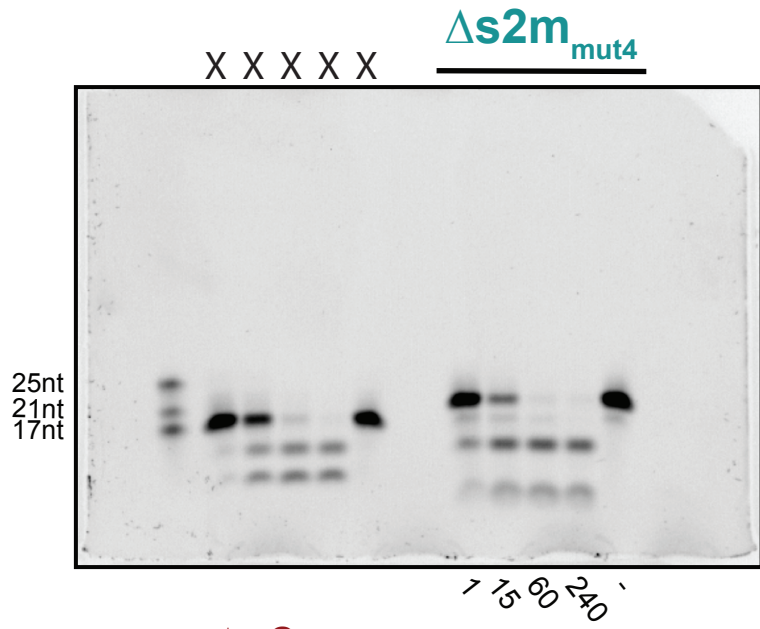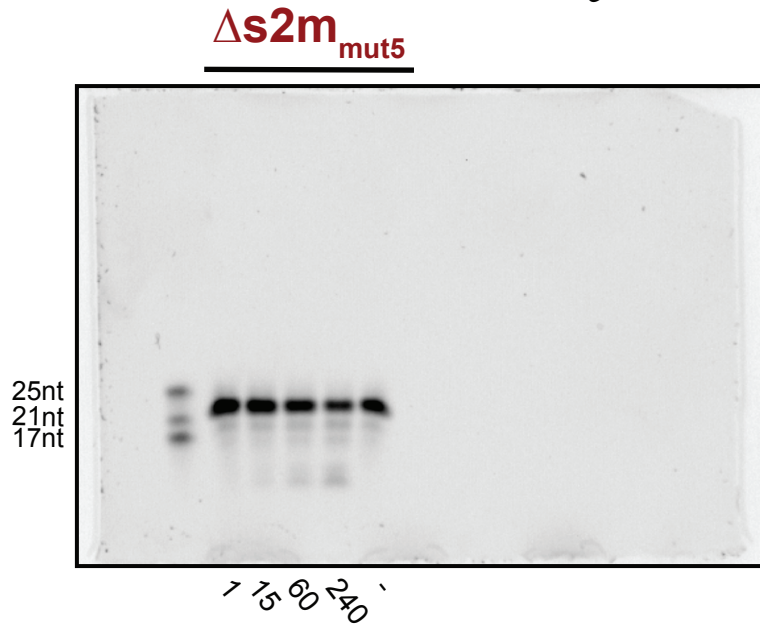

Uncropped gel for S1v Fig. Gel was captured with BioRad GelDock+ using the SYBR Green protocol.

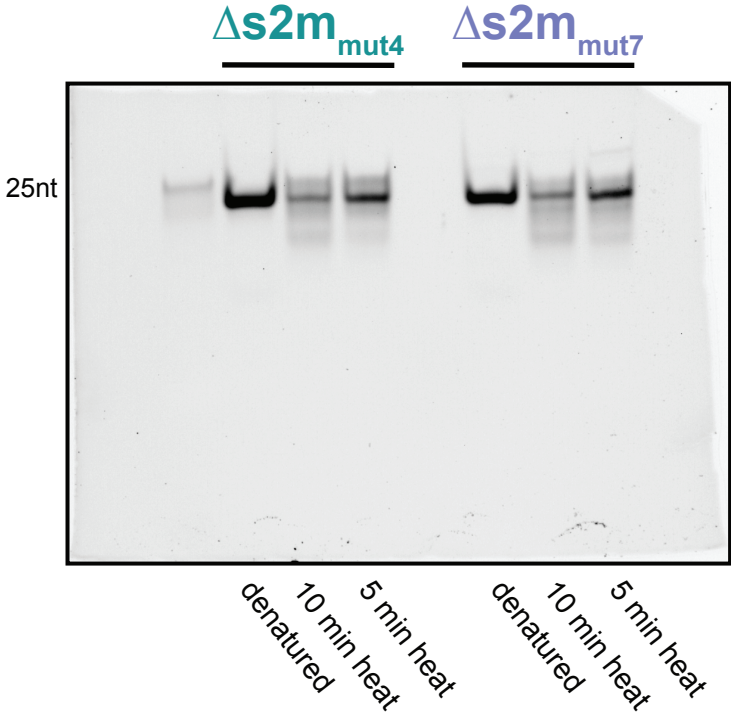

Uncropped gel for S2 Fig. Gel was captured with BioRad GelDock+ using the SYBR Green protocol.

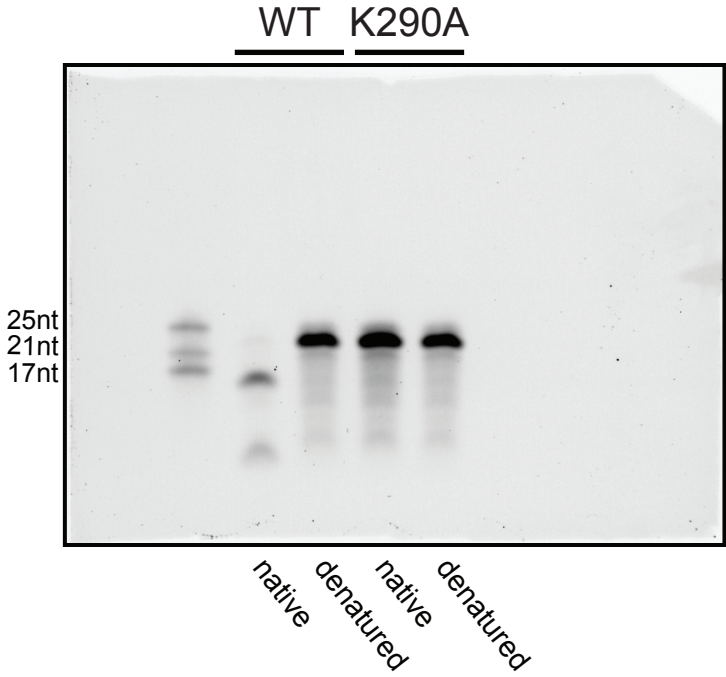



Uncropped gel for S6A Fig. Gel was captured with BioRad GelDock+ using the SYBR Green protocol.

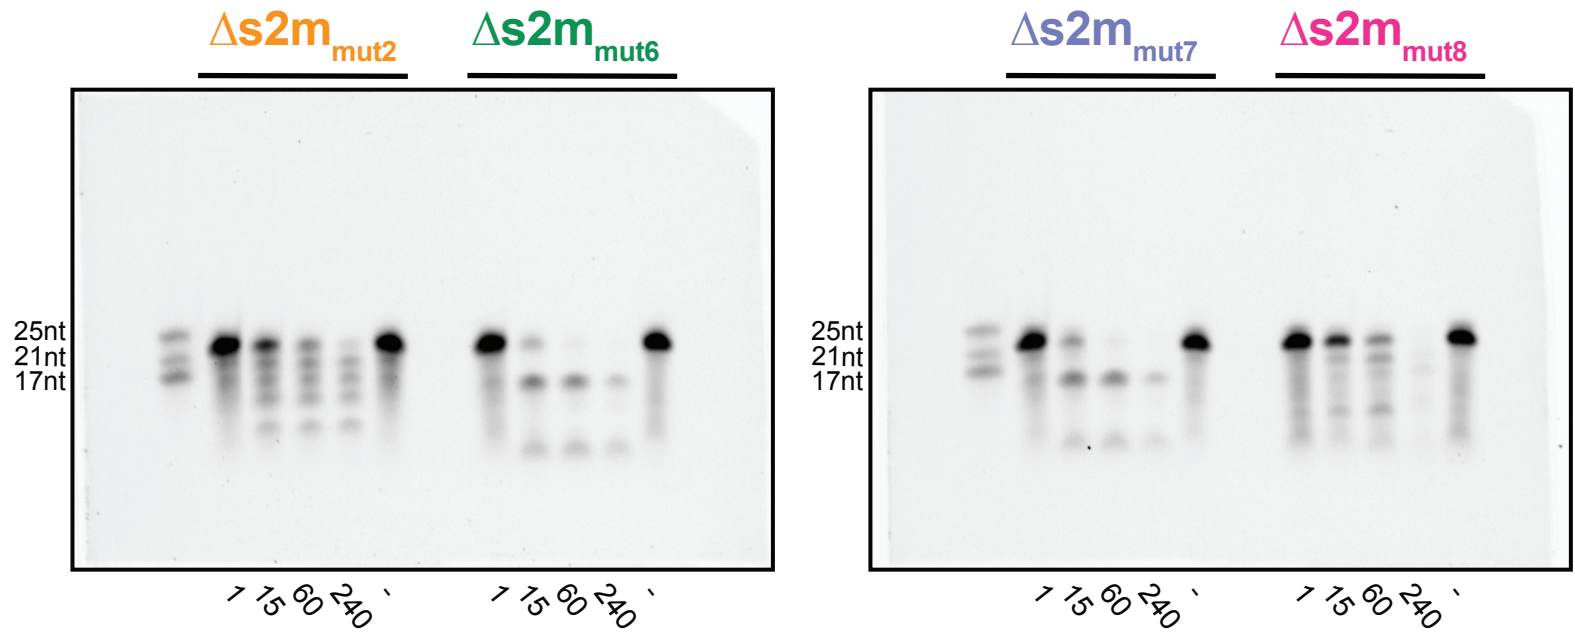

Uncropped gel for S7A Fig. Gel was captured with BioRad GelDock+ using the SYBR Green protocol.

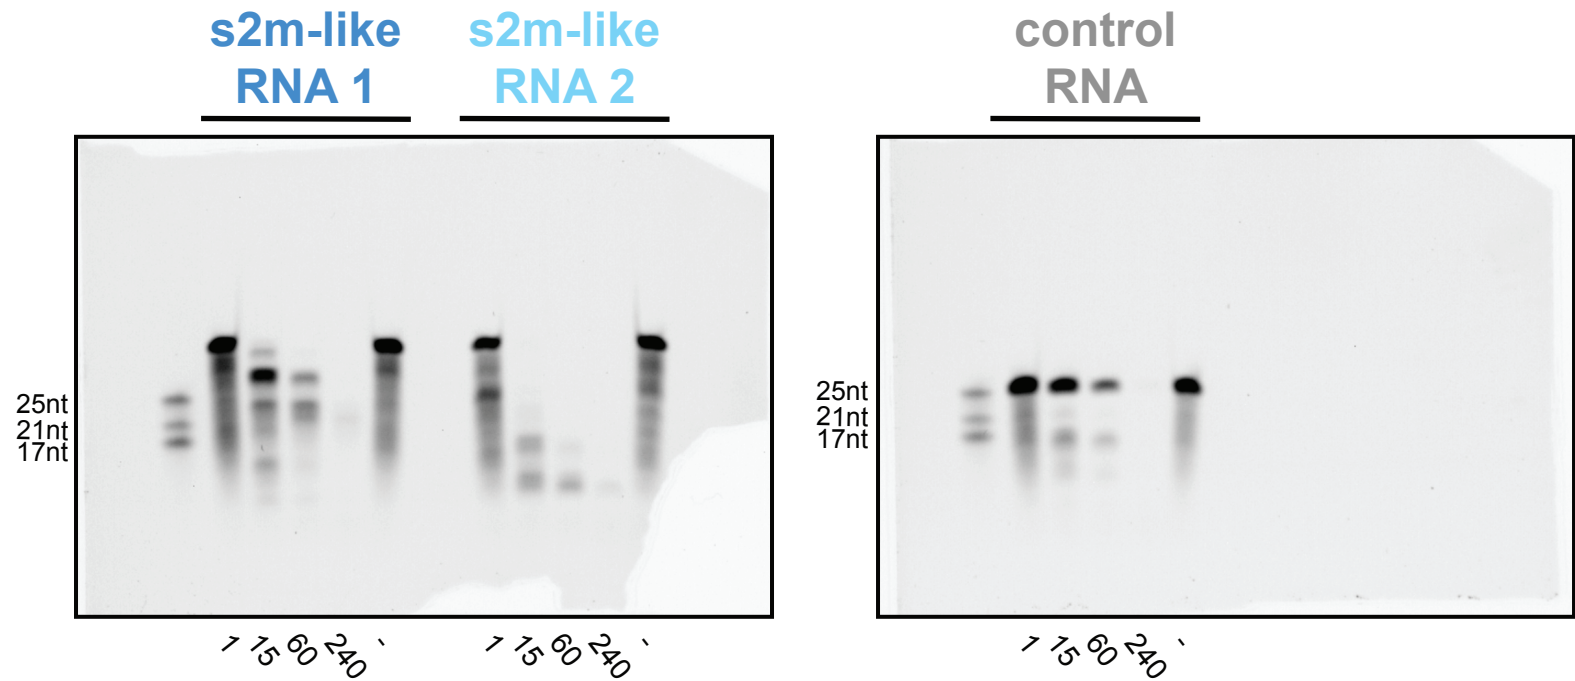

Uncropped gel for S8 Fig. Gel was captured with BioRad GelDock+ using the SYBR Green protocol.

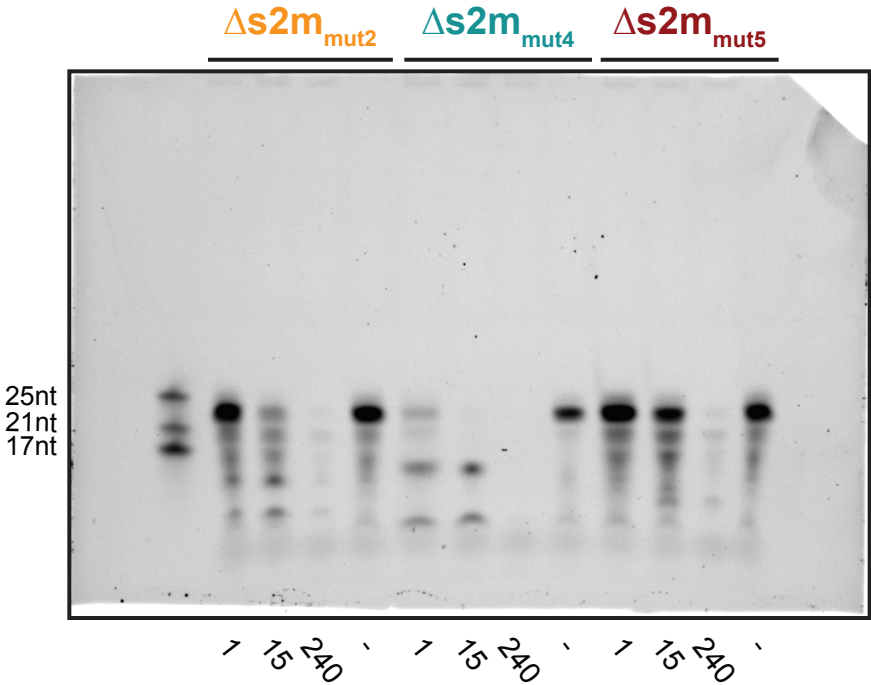

Supplement: pone.0290675.s010.pdf [file pone.0290675.s010.pdf]
